# Supplementary material for: Perpendicular magnetic anisotropy in a single Dy adatom ferrimagnet
Source: Research Square preprint supplement (doi:10.21203/rs.3.rs-6751114/v1), 2025-06-20
Supplement: Supplementary file 1 [file 0a8912bef0cd48f9fefb4de8.pdf]

## Supplemental Material for

### Perpendicular magnetic anisotropy in a single Dy adatom ferrimagnet.

#### COMPUTATIONAL DETAILS

The CF matrix  $\Delta_{\text{CF}}$  in Eq.(1) is obtained by projecting the self-consistent solutions of Eq.(3) into the  $\{\phi_\gamma\}$  local  $f$ -shell basis, giving the “local Hamiltonian”

$$\begin{aligned} [H_{\text{loc}}]_{\gamma\gamma'} &= \int_{\epsilon_b}^{\epsilon_t} d\epsilon \epsilon [N(\epsilon)]_{\gamma\gamma'} \\ &\approx \epsilon_0 \delta_{\gamma\gamma'} + [\xi \mathbf{l} \cdot \mathbf{s} + \Delta_{\text{CF}} + \frac{\Delta_{\text{EX}}}{2} \hat{\sigma}_z]_{\gamma\gamma'} + [V_U]_{\gamma\gamma'}, \end{aligned}$$

where  $[N(\epsilon)]_{\gamma_1\gamma_2}$  is the  $f$ -projected density of states (fDOS) matrix

$$[N(\epsilon)]_{\gamma_1\gamma_2} = -\pi^{-1} \text{Im}[G(z)_{\text{DFT+U}}]_{\gamma_1\gamma_2},$$

$\epsilon_b$  is the bottom of the valence band,  $\epsilon_t$  is the upper cut-off, which is naturally defined by the condition  $\int_{\epsilon_b}^{\epsilon_t} d\epsilon \text{Tr}[N(\epsilon)] = 14$ , and  $\epsilon_0$  is the mean position of the non-interacting  $5f$  level. The matrix  $\Delta_{\text{CF}}$  is then obtained by removing the interacting DFT+U potential  $[V_U]$ , SOC  $[\xi \mathbf{l} \cdot \mathbf{s}]$  and  $[\frac{\Delta_{\text{EX}}}{2} \hat{\sigma}_z]$  from  $H_{\text{loc}}$ .

The SOC parameter  $\xi$  is determined in a standard way,

$$\xi = \int_0^{R_{MT}} dr r \frac{1}{2(Mc)^2} \frac{dV(r)}{dr} (u_l(r))^2,$$

by making use of the radial solutions  $u_l$  of the Kohn-Sham-Dirac scalar-relativistic equations [1], the relativistic mass  $M = m + (E_l - V(r))/2c^2$  at an appropriate energy  $E_l$ , and the radial derivative of spherically-symmetric part of the DFT potential.

The  $\Delta_{\text{EX}}$  is calculated from the energy increase  $\Delta E$  by flipping a direction of  $4f$  spin moment  $M_S^{4f}$  in the simplified DFT+U calculations with the effective spherically symmetric Coulomb  $U_{\text{eff}} = U - J = 6.2$  eV,  $J=0$  [2]. These DFT+U calculations are analogous to the so-called “open core” approximation calculations in which the direction of  $M_S^{Dy}$  with respect to the  $M_S^{Ni}$  can be designated. The  $\Delta_{\text{EX}} = \Delta E / M_S^{Dy}$  of 11 meV is evaluated and used in the further DFT+U(HIA) calculations.

In the DFT+U(HIA) FP-LAPW calculations, 108 special k-points in the two-dimensional Brillouin zone were used, with Gaussian smearing for k-points weighting. The “muffin-tin” radii of  $R_{MT} = 2.85$  a.u. for Dy,  $R_{MT} = 2.20$  a.u. for Ni,  $R_{MT} = 1.25$  a.u. for C were used. The LAPW basis cut-off is defined by the condition  $R_{MT}^{Dy} \times K_{\text{max}} = 8.55$  (where  $K_{\text{max}}$  is the cut-off for LAPW basis set). The spin-orbit coupling (SOC) was included in a self-consistent second-variational procedure [3].

#### MAE FOR GR/NI(111) INTERFACE

We perform the supercell calculations for GR overlayer on the Ni(111) surface. A supercell slab model is shown in Fig. S1A which consists of a nine-layer Ni(111) substrate and GR monolayers on each side of the substrate. We consider the HCP (or “1-3”) (one of the C-atoms is on the top of Ni surface, another is over the second Ni sub-surface ML) placement for graphene overlayer (GR/Ni<sub>9</sub>/GR). The in-plane experimental Ni lattice constant of 4.7 a.u. was adopted and kept fixed in the calculations. The  $d_{[\text{C-Ni}]}$  = 3.875 a.u. [4] separation between the carbon atoms of graphene and the topmost Ni-layer is used. A vacuum region of 20 a.u. is employed in order to reduce the slab’s replica interaction along the  $z$ -direction.

We make use of the relativistic version of the full-potential linearized augmented plane-wave method (FP-LAPW) [3], in which SOC is included in a self-consistent second-variational procedure. The conventional (von Barth-Hedin) local spin-density approximation (LSDA) is adopted in the calculations, which is expected to be valid for itinerant metallic systems. The radii of the atomic muffin-tin (MT) spheres are set to 1.25 a.u. for

C atoms, and 2.2 a.u. for Ni atoms. The parameter  $R_{Ni} \times K_{max} = 7.7$  defines the basis set size and the two-dimensional Brillouin zone (BZ) was sampled with 225  $k$  points.

Spin  $M_S$  and orbital  $M_L$  magnetic MT-sphere moments are shown in Tab. I for the graphene and Ni atom layers in GR/Ni<sub>9</sub>/GR. The moments are practically zero for the C-atoms of graphene. There is a reduction of the  $M_S$  and  $M_L$  values for the surface Ni (Ni-S) layer, indicating the interaction with the C atom of graphene on the top. In addition, there is a sizeable  $M_S$  moment of  $-0.15 \mu_B$  in the interstitial.

TABLE I: Spin ( $M_S$ ) and orbital ( $M_L$ ) magnetic moments in the MT-sphere of the graphene and Ni atom layers (in all calculations, the magnetization is directed along the  $z$ -axis along the surface normal.) The total, and layer-resolved  $T(\theta = \frac{\pi}{4}, \phi = 0)$  for GR/Ni<sub>9</sub>/GR.

| Moments ( $\mu_B$ )                   | Graphene | Ni-S | Ni-(S-1) | Ni-(S-2) | Ni-(S-3) | Ni-(S-4) |
|---------------------------------------|----------|------|----------|----------|----------|----------|
| $M_S$                                 | 0.01     | 0.48 | 0.55     | 0.59     | 0.60     | 0.60     |
| $M_L$                                 | 0.00     | 0.04 | 0.05     | 0.06     | 0.05     | 0.06     |
| Torque (meV)                          | Total    | Ni-S | Ni-(S-1) | Ni-(S-2) | Ni-(S-3) | Ni-(S-4) |
| $T(\theta = \frac{\pi}{4}, \phi = 0)$ | 0.18     | 0.25 | 0.03     | -0.05    | -0.07    | 0.02     |

We make use of the magnetic force theorem [6] to evaluate the uniaxial magnetic anisotropy (MAE) for GR/Ni<sub>9</sub>/GR. The spin magnetic moment  $M_S$  is rotated, and a single energy band calculation is performed for the new orientation of  $M_S$ . The MAE results from SOC-induced changes in the band eigenvalues  $E_A(\theta, \phi) = \sum_i^{occ} \epsilon_i(\theta, \phi)$ . For a hexagonal symmetry, the magnetic anisotropic energy  $E_A(\theta, \phi)$  as a function of the spherical angles  $\theta$  and  $\phi$  reads,

$$E_A(\theta, \phi) = K_1 \sin^2 \theta + K_2 \sin^4 \theta + K_3 \sin^6 \theta + K_4 \sin^6 \theta \cos 6\phi, \quad (1)$$

where,  $K_1$  and  $K_2$  are the uniaxial MAE constants, and  $K_3$  and  $K_4$  are the higher-order anisotropy constants [5].

In practice, it is more convenient to use the linear response theory, and evaluate the torque  $T(\theta, \phi) = \partial E_A(\theta, \phi) / \partial \theta$  [7]. From the angular dependence of the torque,

$$T(\theta, \phi) = K_1 \sin 2\theta + K_2 \sin 2\theta (1 - \cos 2\theta) + \frac{3}{4} (K_3 + K_4 \cos 6\phi) \sin 2\theta (1 - \cos 2\theta)^2, \quad (2)$$

the uniaxial MAE constants are evaluated. An advantage of this approach is that it allows separation of the Eq.(2) into the sum of the element-specific contributions from different atoms in the unit cell [7], and to evaluate the element-specific contributions to the anisotropy constants and the total MAE. We point out that care should be taken on the convergence of the  $T(\theta, \phi)$  torque Eq.(2) with respect to the two-dimensional BZ integration. For GR/Ni<sub>9</sub>/GR case, we found that the torque value convergence better than 0.1 meV is achieved for 1521  $k$ -points in the 2D-BZ.

The  $\theta$  angular dependence of  $T(\theta, \phi)$  in Eq.(2) with  $\phi = 0$  is shown in Fig. 1S for GR/Ni<sub>9</sub>/GR unit cell. Note that the  $T(\theta, \phi = \pi/2)$  angular dependence is found to be very similar. In what follows, we will neglect the sixth-order anisotropy constants  $K_3$  and  $K_4$ , and consider only the  $K_1$  and  $K_2$  uniaxial anisotropies in Eq.(2). Fitting  $T(\theta, \phi)$  angular dependence by Eq.(2), we obtain  $K_1 = 0.21$  meV and  $K_2 = -0.03$  meV per unit cell. The uniaxial MAE =  $E_A[M||x] - E_A[M||z] (= K_1 + K_2) = 0.18$  meV per unit cell is evaluated. The positive MAE sign indicates the perpendicular magnetic anisotropy for GR/Ni<sub>9</sub>/GR.

As follows from Eq.(2), the uniaxial MAE is equal to the value of  $T(\theta = \frac{\pi}{4}, \phi = 0)$ . The total, and layer-resolved  $T(\theta = \frac{\pi}{4}, \phi = 0)$  for GR/Ni<sub>9</sub>/GR unit cell are shown in Table S1. Note that for surface Ni (Ni-S), sub-surface Ni (Ni-(S-1)), Ni-(S-2), and Ni-(S-3) layers, these are twice the contributions from individual Ni layers in the unit cell. In Table S2, we show the layer-resolved contributions to the uniaxial MAE. The C atoms of graphene do not contribute to the total torque since their induced magnetic moments are small, and the SOC is weak. The surface Ni (Ni-S) layer contributes the most to the positive MAE. The MAE contribution from the Ni layers, which are away from the GR/Ni(111) interface is substantially smaller.

It is common to write the MAE of the ferromagnetic film as

$$\text{MAE} = d \times K_V + 2K_I,$$

where  $K_V$  is a "volume" and  $K_I$  is the GR/Ni<sub>9</sub>/GR interface contributions.. Since we do not consider any strain in the Ni film, the  $K_V$  must go to zero. It is consistent with the layer-resolved MAE shown in Table S2.

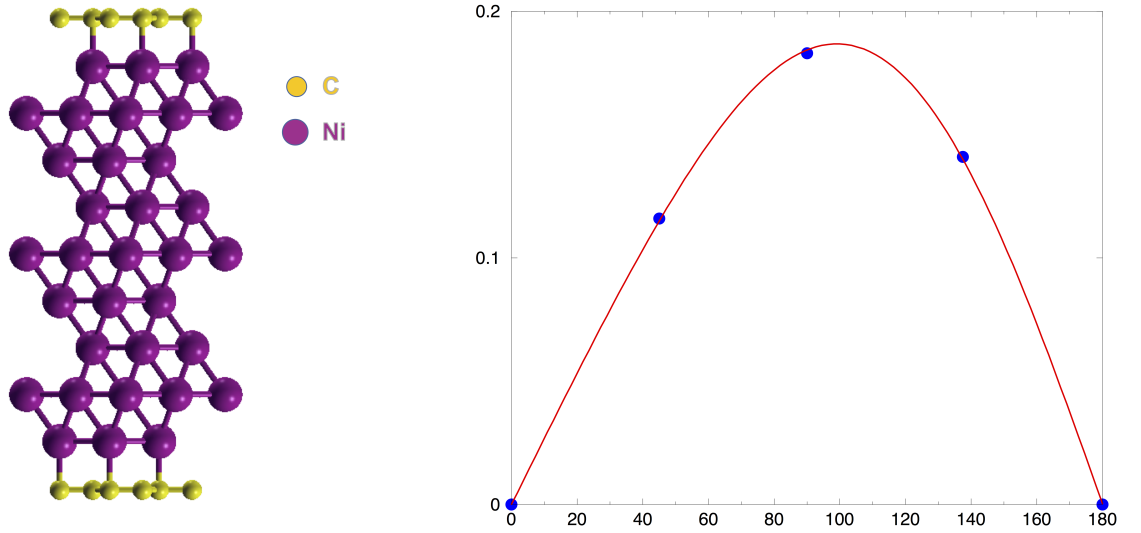

FIG. 1: A schematic crystal structure used to represent the GR/Ni<sub>9</sub>/GR (A). The  $\theta$  angular dependence of  $T(\theta, \phi = 0)$  per unit cell (B).

TABLE II: The layer-resolved contributions to the MAE for GR/Ni<sub>9</sub>/GR (meV).

| MAE   | GR  | Ni-S | Ni-(S-1) | Ni-(S-2) | Ni-(S-3) | Ni-(S-4) |
|-------|-----|------|----------|----------|----------|----------|
| (meV) | 0.0 | 0.12 | 0.02     | -0.03    | -0.03    | 0.02     |

Additional shape anisotropy (SAE) induced by the magnetic dipole-dipole interaction can be estimated using the relation  $SAE = -2\pi M^2$  to the magnetisation density  $M$  (in CGS units). This additional negative SAE of  $\approx -0.008$  meV per atom [9] can reduce the positive MAE. Thus, the small and positive total magnetocrystalline and shape MAE of  $\approx 0.11$  meV is found for GR/Ni<sub>9</sub>/GR. Recent XAS and XMCD measurements [8] show small positive MAE for the GR/Ni(111), in a qualitative agreement with our calculations.

- 
- [1] A. MacDonald, W. Pickett and D. Koelling, J. Phys. C: Solid State Phys. **13**, 2675 (1980).
  - [2] J. Ishizuka, S. Sumita, A. Daido, and Y. Yanese, Phys. Rev. Lett. **123**, 217001 (2019).
  - [3] A. B. Shick, D. L. Novikov, and A. J. Freeman, Phys. Rev. B **56**, R14259 (1997).
  - [4] P. A. Khomyakov *et al.*, Phys. Rev. B **79** (2009) 195425.
  - [5] S. Chikazumi, *Physics of Ferromagnetism*, Oxford, Clarendon Press, Oxford University Press (1997), p. 655.
  - [6] A. I. Liechtenstein, M. Katsnelson, V. Antropov, and V. Gubanov, J. Magn. Mater. **67**, 65 (1987).
  - [7] S. Khmelevskyi, A. B. Shick, and P. Mohn, Phys. Rev. B **83**, 224419 (2011).
  - [8] A. Barla *et al.*, ACS Nano **10**, 1101 (2016).
  - [9] F. Maca, A. B. Shick, J. Redinger, R. Podloucky, P. Weinberger, Czechoslovak J. of Phys. **53**, 33 (2003).
